# Supplementary material
Source: publisher figshare collection journal article supplement (https://gsapubs.figshare.com/ndownloader/files/24099554)
Supplement: Supplementary file 1 [file 24099554]

| Table S1: Petrography, grain definitions and parameters for recalculation | |
| --- | --- |
| **Symbol** | **Definition** |
| **Qm** | Monocrystalline quartz |
| **Qpq** | Polycrystalline quartz |
| **Qc** | Chert |
| **K** | Potassium feldspar, myrmekitic grains |
| **P** | Plagioclase feldspar |
| **Lmf** | Foliated quartz-mica metamorphic grains |
| **Lmp** | Polugonal quartz-mica metamorphic grains, Schists |
| **Lmv** | metavolcanic grains with epidote and/or chlorite |
| **Lss** | Sedimentary lithic grains: siltstone, argillite, sandstone |
| **Lsc** | Detrital carbonate grains (=CE from Zuffa, 1980) |
| **Lvf** | Felsitic volcanic lithic grains |
| **Lvl** | Lathwork volcanic lithic grains |
| **Lvm** | Microlitic volcanic lithic grains |
| **Lvt** | Tuffaceous and vitric volcanic lithic grains |
| **accessory** | Zircon, tourmaline, apatite, titanite, mica, magnetite. |
|  | **TOTAL** |
|  | **Recalculated Parameters** |
| **Qt** | Total quartzose grains (= Qm + Qpq + Qc) |
| **F** | Total feldspar (= K + P) |
| **Lm** | Total metamorphic grains (= Lmf + Lmp + Lmv) |
| **Lv** | Total volcanic grians (+ Lvf + Lvl + Lvm + Lvt) |
| **Ls** | Total sedimentary grains (+ Lss + Lsc) |
| **L** | Total unstable lithic grains (+ Lm + Lv + Ls) |
| **Qp** | Total polycrystalline quartz (= Qpq + Qc) |
| **Lt** | Total Lithic grains (= L + Qp) |
